specific peptides that can be used to create a personalized, targeted T cell therapy for children with high risk medulloblastoma.

#### IMMU-16. INTRA-TUMOURAL IL-12 DELIVERY ENABLES CAR T-CELL IMMUNOTHERAPY FOR HIGH-GRADE GLIOMA

Giulia Agliardi<sup>1</sup>, Anna Rita Liuzzi<sup>2</sup>, Alastair Hotblack<sup>1</sup>, Donatella De Feo<sup>2</sup>, Nicolás Núñez<sup>2</sup>, Ekaterina Friebe<sup>2</sup>, Francesco Nannini<sup>1</sup>, Thomas Roberts<sup>3</sup>, Rajiv Ramasawmy<sup>3</sup>, Cassandra Stowe<sup>1</sup>, Iwan Williams<sup>1</sup>, Bernard Siow<sup>3,4</sup>, Mark Lythgoe<sup>3</sup>, Tammy Kalber<sup>3</sup>, Sergio Quezada<sup>1</sup>, Martin Pule<sup>1</sup>, Sonia Tugues<sup>2</sup>, Burkhard Becher<sup>2</sup>, and Karin Straathof<sup>3,1</sup>, <sup>1</sup>UCL Cancer Institute, London, GB, United Kingdom, <sup>2</sup>Institute of Experimental Immunology, University of Zurich, Zurich, CH, Switzerland, <sup>3</sup>UCL Centre for Advanced Biomedical Imaging, London, GB, United Kingdom, <sup>4</sup>Francis Crick Institute, London, GB, United Kingdom, <sup>5</sup>UCL Great Ormond Street Institute of Child Health, London, GB, United Kingdom

Treatment with T-cells redirected to tumour specificity with a chimeric antigen receptor (CAR) may be well suited to treat intracranial tumours due to the ability of T-cells to access the central nervous system and migrate to infiltrative sites of disease. In adult glioblastoma, a case report of local and distant eradication of intracranial and spinal tumour deposits following intraventricular infusion of IL13Ra2-CAR T-cells indicates the potential of this approach. However, in contrast to the sustained complete remissions observed in haematological malignancies, in the majority of patients with glioblastoma CAR T-cell therapy has not resulted in clinical benefit. Tumour heterogeneity and the highly immune inhibitory tumour microenvironment (TME) are likely key barriers to achieving durable anti-tumour immunity. Here we use intra-tumoural administration of IL-12 to enable CAR T-cell immunity. We employed CAR-T cells targeting the tumour-specific epidermal growth factor variant III (EGFRvIII). In an immunocompetent orthotopic mouse model of high-grade glioma, we show that CAR-T cells alone failed to control fully established tumour, but when combined with a single, locally delivered dose of IL-12, durable antitumor responses were achieved. IL-12 not only boosted cytotoxicity of CAR T-cells, but also reshaped the TME driving increased infiltration of proinflammatory CD4+ T-cells, decreased numbers of regulatory T-cells (Tregs) and activation of the myeloid compartment. Critically, immunotherapy enabling benefits of IL-12 were achieved with minimal systemic effects. Our findings show that local delivery of IL-12 is an effective adjuvant for CAR-T cell therapy for high-grade glioma. Assessment of application in high-risk childhood brain tumours is ongoing.

#### IMMU-17. CAR T CELLS TARGETING THE INTEGRIN ALPHA<sub>4</sub>BETA<sub>3</sub> EXHIBIT ROBUST ANTI-TUMOR RESPONSES AGAINST DIFFUSE INTRINSIC PONTINE GLIOMA (DIPG) AND GLIOBLASTOMA (GBM)

Dustin Cobb, Jacopo de Rossi, Lixia Liu, Erin An, and Daniel Lee; University of Virginia, Charlottesville, VA, USA

Effective therapies for DIPG and GBM are lacking. CD19 chimeric antigen receptor (CAR) T cells are highly effective in patients with refractory B-cell malignancies. We aim to develop novel CARs for high-grade gliomas. The integrin complex alpha<sub>4</sub>beta<sub>3</sub> was selected as a CAR-T cell target due to its expression on gliomas and their vasculature, yet with minimal expression throughout normal tissues, vessels and organs. Indeed, a majority of DIPG and GBM cell lines express surface alpha<sub>4</sub>beta<sub>3</sub>. Second-generation CAR-T cells expressing an anti-alpha<sub>4</sub>beta<sub>3</sub> scFv and either a CD28 or 4-1BB co-stimulatory domain and CD3zeta were constructed. Transduced healthy, donor-derived T cells exhibited high level CAR expression, efficient expansion, and representative populations of memory subsets including central, effector, and stem cell-like memory CAR-T cells. alpha<sub>4</sub>beta<sub>3</sub>28z and alpha<sub>4</sub>beta<sub>3</sub>BBz CAR-T cells exhibited antigen-specific *in vitro* cytotoxicity and cytokine production against DIPG and GBM cell lines. Both CARs mediated rapid and robust anti-tumor responses in NSG mice bearing orthotopic DIPG or GBM tumors. 5/13 alpha<sub>4</sub>beta<sub>3</sub>28z and 0/14 alpha<sub>4</sub>beta<sub>3</sub>BBz treated animals died without detectable disease within 2 weeks of infusion suggesting different toxicity profiles and is consistent with faster CAR-T cell expansion in CD28-versus 4-1BB-containing CD19 CAR-T cells seen clinically. Our results demonstrate that alpha<sub>4</sub>beta<sub>3</sub>BBz CAR-T cell therapy may be both highly effective and safe in DIPG and GBM patients. Due to the restricted nature of alpha<sub>4</sub>beta<sub>3</sub> expression in normal tissues, the robust responses seen in tumor-bearing mice, and the slower kinetics of alpha<sub>4</sub>beta<sub>3</sub>BBz CAR-T cell expansion, a first-in-human clinical trial is being planned.

#### IMMU-18. FAVORABLE OUTCOME IN REPLICATION REPAIR DEFICIENT HYPERMUTANT BRAIN TUMORS TO IMMUNE CHECKPOINT INHIBITION: AN INTERNATIONAL RRD CONSORTIUM REGISTRY STUDY

Eric Bouffert<sup>1</sup>, Sumedha Sudhaman<sup>1</sup>, Jiil Chung<sup>1</sup>, Jacalyn Kelly<sup>1</sup>, Ailish Coblentz<sup>1</sup>, Melissa Edwards<sup>1</sup>, Tatiana Lipman<sup>1</sup>,

Cindy Zhang<sup>1</sup>, Ayse Bahar Ercan<sup>1</sup>, Lauren Sambira<sup>1</sup>, Anne Bendel<sup>2</sup>, Stefan Bielack<sup>3</sup>, Elisabeth Koustenis<sup>3</sup>, Deborah Blumenthal<sup>4</sup>, Daniel Bowers<sup>5</sup>, Alberto Broniscer<sup>6</sup>, Annika Bronsema<sup>7</sup>, Sara Carroll<sup>8</sup>, Stefano Chiaravalli<sup>9</sup>, Kristina Cole<sup>10</sup>, Shlomi Constantini<sup>4</sup>, Rebecca Loret De Mola<sup>11</sup>, Gavin Dunn<sup>12</sup>, Charlotta Fröjd<sup>13</sup>, David Gass<sup>14</sup>, Karen Gauvain<sup>12</sup>, Ben George<sup>15</sup>, Nobuko Hijiya<sup>16</sup>, Lindsey Hoffman<sup>17</sup>, Jeffrey Knipstein<sup>15</sup>, Ted Laetsch<sup>5</sup>, Valérie Larouche<sup>18</sup>, Alvaro Lassale<sup>19</sup>, Scott Lindhorst<sup>20</sup>, Alexander Lossos<sup>21</sup>, Sandra Luna-Fineman<sup>17</sup>, Vanan Magimairajan<sup>22</sup>, Gary Mason<sup>23</sup>, Warren Mason<sup>24</sup>, Maura Massimino<sup>9</sup>, Oz Mordechai<sup>25</sup>, Enrico Opocher<sup>26</sup>, Michal Oren<sup>27</sup>, Michael Osborn<sup>28</sup>, Alyssa Reddy<sup>29</sup>, Mark Remke<sup>30</sup>, Sumita Roy<sup>31</sup>, Magnus Sabel<sup>32</sup>, David Samuel<sup>33</sup>, Kami Schneider<sup>17</sup>, Santanu Sen<sup>34</sup>, Duncan Stearns<sup>35</sup>, David Summerauer<sup>36</sup>, Gregory Thomas<sup>11</sup>, Patrick Tomboc<sup>37</sup>, An Van Damme<sup>38</sup>, Margaret Wierman<sup>39</sup>, Ira Winer<sup>40</sup>, Lee Yi Yen<sup>41</sup>, Michal Zapotocky<sup>36</sup>, David Ziegler<sup>42</sup>, Stefanie Zimmermann<sup>43</sup>, Rina Dvir<sup>4</sup>, Gidi Rechavi<sup>27</sup>, Carol Durno<sup>1</sup>, Melyssa Aronson<sup>44</sup>, Michael Taylor<sup>1</sup>, Peter Dirks<sup>1</sup>, Trevor Pugh<sup>45</sup>, Adam Shlien<sup>1</sup>, Cynthia Hawkins<sup>1</sup>, Daniel Morgenstern<sup>1</sup>, and Uri Tabori<sup>1</sup>. <sup>1</sup>The Hospital for Sick Children, Toronto, ON, Canada, <sup>2</sup>Children's Minnesota Minneapolis Hospital, Minneapolis, MN, USA, <sup>3</sup>Klinikum Stuttgart-Olgahospital, Stuttgart, Germany, <sup>4</sup>Tel-Aviv Sourasky Medical Center, Tel-Aviv, Israel, <sup>5</sup>UT Southwestern Medical Centre, Dallas, TX, USA, <sup>6</sup>St. Jude's Children's Research Hospital, Memphis, TN, USA, <sup>7</sup>University Medical Centre of Hamburg-Eppendorf, Hamburg, Germany, <sup>8</sup>Cleveland Clinic Florida, Weston, FL, USA, <sup>9</sup>Fondazione IRCCS Istituto Nazionale dei Tumori, Milan, Italy, <sup>10</sup>Children's Hospital of Philadelphia, Philadelphia, PA, USA, <sup>11</sup>Oregon Health & Science University, Portland, OR, USA, <sup>12</sup>Washington University School of Medicine, St. Louis, MO, USA, <sup>13</sup>Västra Götalandsregionen, Vänersborg, Sweden, <sup>14</sup>Carolinas Healthcare System, Charlotte, NC, USA, <sup>15</sup>Medical College of Wisconsin, Milwaukee, WI, USA, <sup>16</sup>Ann and Robert H. Lurie Children's Hospital of Chicago, Chicago, IL, USA, <sup>17</sup>Children's Hospital of Colorado, Aurora, CO, USA, <sup>18</sup>Centre Mère-Enfant Soleil du CHU de Québec, Sainte-Foy, QC, Canada, <sup>19</sup>Hospital Infantil Universitario Niño Jesús, Madrid, Spain, <sup>20</sup>Medical University of South Carolina, Charleston, SC, USA, <sup>21</sup>Hadassah Medical Organization, Jerusalem, Israel, <sup>22</sup>Cancer Care Manitoba, Winnipeg, MB, Canada, <sup>23</sup>Children's Hospital of Pittsburgh of UPMC, Pittsburgh, PA, USA, <sup>24</sup>Princess Margaret Hospital, Toronto, ON, Canada, <sup>25</sup>Rambam Academic Hospital, Haifa, Israel, <sup>26</sup>Università Degli Studi di Milano, Milan, Italy, <sup>27</sup>The Chaim Sheba Medical Center, Tel HaShomer, Israel, <sup>28</sup>Women's and Children's Hospital, North Adelaide, Australia, <sup>29</sup>UCSF Benioff Children's Hospital, San Francisco, CA, USA, <sup>30</sup>University Hospital Düsseldorf, Düsseldorf, Germany, <sup>31</sup>Children's Hospital of Michigan, Detroit, MI, USA, <sup>32</sup>Queen Silvia Children's Hospital, Göteborg, Sweden, <sup>33</sup>Valley Children's Hospital, Madera, USA, <sup>34</sup>Kokilaben Dhirubhai Ambani Hospital, Mumbai, India, <sup>35</sup>Rainbow Babies and Children's Hospital, Cleveland, OH, USA, <sup>36</sup>FN Motol, Prague, Czech Republic, <sup>37</sup>West Virginia University Children's Hospital, Morgantown, WV, USA, <sup>38</sup>Saint Luc UCL, Brussels, Belgium, <sup>39</sup>University of Colorado (UCHealth), Aurora, CO, USA, <sup>40</sup>Wayne State University, Detroit, MI, USA, <sup>41</sup>Taipei Veterans General Hospital, Taipei City, Taiwan, <sup>42</sup>Kids Cancer Centre, Randwick, Australia, <sup>43</sup>Universitätsklinikum Frankfurt, Frankfurt, Germany, <sup>44</sup>Mount Sinai Hospital, Toronto, ON, Canada, <sup>45</sup>Princess Margaret Cancer Centre, Toronto, ON, Canada

Pediatric brain tumors with replication repair deficiency (RRD) are hypermutant and may respond to immune checkpoint inhibition (ICI). We performed a consortium registry study of ICI in recurrent RRD cancers. Clinical and companion biomarkers were collected longitudinally on all patients. Biomarkers included tumor mutational burden (TMB), neoantigens and genetic signatures obtained from whole genome and exome sequencing. Immune inference was obtained by RNAseq and T cell rearrangement was collected in the tumor and in blood throughout treatment. Of the 46 tumors on the study, 32 were brain tumors with glioblastoma in 96%. Rapid, objective responses (>50%) were observed in 50% of glioblastomas. Three year overall survival for the whole cohort was 48+/-8% which compares favorably with historical controls. Brain tumors fared worse with OS of 39+/-10% and late recurrences observed even after 2 years of therapy (p=0.02). Tumor size and acute "flare" constitute poor outcome throughout all cancers. While all tumors are hypermutant, TMB and predicted neoantigens correlated with response to ICI (p=0.02). Specific signatures extracted from SNVs and total mutations predicted response to ICI and favorable outcome (p=0.005). RNA inference and TCR reveal that the FLARE phenotype is mostly acute nonspecific immune response and not true progression. Finally, glioblastomas (n=8) which failed single agent ICI had favorable responses to combinational immunotherapies with prolonged survival of 65%+/-8% at one year after failure vs 0 for other patients (p=0.01). RRD glioblastomas exhibit favorable outcome and responses to ICI. Combinational therapies based on tumor and immune signatures of these cancers are necessary.
